# Supplementary material
Source: publisher site journal article supplement (https://static.cambridge.org/content/id/urn:cambridge.org:id:article:S1366728918000020/resource/name/S1366728918000020supp001.docx)
Supplement: Supplementary file 1 [file S1366728918000020supp001.docx]

Appendix A

Languages of Bilingual Participants

Table A1

L2s of Edinburgh Late Bilinguals (L1: English)

| **Language** | ***n*** |
| --- | --- |
| Mandarin | 23 |
| Japanese | 8 |
| French | 6 |
| Spanish | 9 |
| German | 5 |
| Spanish/German/ French  (double major) | 11 |
| Arabic | 1 |

Table A2

L2s of Singapore Bilinguals (L1: English)

| **Language** | **n** |
| --- | --- |
| Mandarin | 32 |
| Malay | 38 |

Table A3

Language Combinations of Edinburgh Early Bilinguals

| **Languages** | ***n*** | **Languages** | ***n*** |
| --- | --- | --- | --- |
| English – French | 8 | Greek – German | 1 |
| English – German | 6 | French – Polish | 1 |
| English – Italian | 3 | Swedish – Icelandic | 1 |
| English – Mandarin | 3 | French – Swiss German | 1 |
| English – Spanish | 3 | Mandarin – Hungarian | 1 |
| English – Polish | 2 | Russian – German | 1 |
| English – Greek | 2 | English – Swedish | 1 |
| English – Punjabi | 2 | English – Finnish | 1 |
| English – Urdu | 1 | English – Romanian | 1 |
| German – Italian | 1 | Italian – Slovenian | 1 |
| Spanish – Polish | 1 | English – Serbian | 1 |
| French – Spanish | 1 | Vietnamese – Polish | 1 |
| English – Czech | 1 |  |  |

Appendix B

Background Questionnaire

| **PART I: GENERAL DEMOGRAPHIC INFORMATION** | | | |
| --- | --- | --- | --- |
| Age....................................................................Gender........................................Handedness....................................................  Study area/ Major .........................................................................................................................................................................  Current year of study (i.e. Yr 2 Sem 1) .................................................................................................................................  Country of birth and language used .......................................................................................................................................  At what age did you start school ............................. years old  Please list **all** countries (outside your home country) you have lived in: | | | |
| Country | Age | | Languages spoken in the country |
| E.g. Belgium | 2-12 | | French, Flemish |
|  |  | |  |
|  |  | |  |
|  |  | |  |
|  |  | |  |
|  |  | |  |
|  |  | |  |
| **PART II: LANGUAGES** | | | |
| Please list all the languages you know in order of acquisition, with your native language first.  **Please indicate below if you grew up with more than one language at home.* | | | |
| 1. | | | |
| 2. | | | |
| 3. | | | |
| 4. | | | |
| 5. | | | |
| Please list all the languages you know in order of usage frequency, starting with the one you use most often. | | | |
| 1.  2.  3. | | 4.  5.  6. | |
| Please list all the languages you know in order of proficiency, starting with your most proficient language. | | | |
| 1.  2.  3. | | 4.  5.  6. | |
| **PART III: PARENTS’ MOTHER TONGUES** | | | |
| What is your father’s main language? ..............................................................................................................................  Does your father speak any other languages? Please specify …………………………………………………………  Please list your father’s highest educational level  ☐ Primary ☐ O Levels ☐ A Levels ☐ Bachelor’s Degree ☐Postgraduate Degree  What is your mother’s main language? ..............................................................................................................................  Does your mother speak any other languages? Please specify …………………………………………………………  Please list your mother’s highest educational level  ☐ Primary ☐ O Levels ☐ A Levels ☐ Bachelor’s Degree ☐Postgraduate Degree | | | |
| **PART IV: MUSICAL BACKGROUND** | | | |
| Do (did) you play a musical instrument or sing? □Yes □ No  If yes, please state which instrument, and how long you have been playing it for  ………………….……….……….……….……….……….……….……….……….……….……….……….…….……….……….……….………………….……….………………………..…….……….……….……….…  How often do you play?  *(4)* Daily *(3)* A few times a week *(2)* A few times a month *(1)* A few times a year *(0)* Once a year or less | | | |
| **PART V: VIDEO GAMING** | | | |
| Do (did) you play video games? (this includes all forms of computer games) □ Yes □ No  If yes, please state the type of game(s) which you play (i.e. computer, phone games), and at what age you started  ………………….……….……….……….……….……….……….……….……….……….……….……….…….……….……….……….………………….……….……….………………………………..….……….………  How often do you play?  *(4)* Daily *(3)* A few times a week *(2)* A few times a month *(1)* A few times a year *(0)* Once a year or less | | | |

| **HOME LANGUAGE 1:** | | | | | | | | | | | | |
| --- | --- | --- | --- | --- | --- | --- | --- | --- | --- | --- | --- | --- |
| **LANGUAGE HISTORY – ACQUISITION OF LANGUAGE** | | | | | | | | | | | | |
| 1. Choose the most appropriate option: I understand the language but I don’t speak it   I both understand and speak the language   1. If you were schooled in this language, at what age did you learn to write it? _ years old   Please rate how often you used this language in the following contexts **during your childhood.** | | | | | | | | | | | | |
| ***FAMILY*** |  |  | | |  | | |  | | |  | |
| Mother | Always | Often | | | Rarely | | | Never | | | Not applicable | |
| Father | Always | Often | | | Rarely | | | Never | | | Not applicable | |
| Grandparents | Always | Often | | | Rarely | | | Never | | | Not applicable | |
| Siblings | Always | Often | | | Rarely | | | Never | | | Not applicable | |
| Other relatives | Always | Often | | | Rarely | | | Never | | | Not applicable | |
| ***OFFICIAL*** | | | | | | | | | | | | |
| Schooling | Always | Often | | Rarely | | | Never | | | Not applicable | | |
| Teachers | Always | Often | | Rarely | | | Never | | | Not applicable | | |
| Classmates | Always | Often | | Rarely | | | Never | | | Not applicable | | |
| ***IMMEDIATE ENVIRONMENT*** | | | | | | | | | | | | |
| Friends | Always | Often | | Rarely | | | Never | | | Not applicable | | |
| Neighbours | Always | Often | | Rarely | | | Never | | | Not applicable | | |
|  |  |  | |  | | |  | | |  | | |
| **USAGE** | | | | | | | | | | | | |
| Are you still using this language? Yes No  If no, when did you stop using it? _ years old If yes, how often do you use it currently?  Daily Weekly Monthly Yearly  In what context do you use this language? (You can pick more than one)  Family (Parents, partner, relatives, children etc.) Work/School Friends/ Neighbours TV/Radio Books/magazines Shopping Others (Please specify: …………………………………….…) | | | | | | | | | | | | |
| **LANGUAGE PROFICIENCY** | | | | | | | | | | | | |
| Please rate your proficiency in this language in each of the following aspects: ( *1- poor; 4 - native/near native)* | | | | | | | | | | | | |
| Speaking | | | 1 | | | 2 | | | 3 | | | 4 |
| Understanding | | | 1 | | | 2 | | | 3 | | | 4 |
| Reading | | | 1 | | | 2 | | | 3 | | | 4 |
| Writing | | | 1 | | | 2 | | | 3 | | | 4 |
| **NOTES** | | | | | | | | | | | | |

| **HOME LANGUAGE 2:** | | | | | | | | | | | | |
| --- | --- | --- | --- | --- | --- | --- | --- | --- | --- | --- | --- | --- |
| **LANGUAGE HISTORY – ACQUISITION OF LANGUAGE** | | | | | | | | | | | | |
| 1. Choose the most appropriate option: I understand the language but I don’t speak it   I both understand and speak the language   1. If you were schooled in this language, at what age did you learn to write it? _ years old   Please rate how often you used this language in the following contexts **during your childhood.** | | | | | | | | | | | | |
| ***FAMILY*** |  |  | | |  | | |  | | |  | |
| Mother | Always | Often | | | Rarely | | | Never | | | Not applicable | |
| Father | Always | Often | | | Rarely | | | Never | | | Not applicable | |
| Grandparents | Always | Often | | | Rarely | | | Never | | | Not applicable | |
| Siblings | Always | Often | | | Rarely | | | Never | | | Not applicable | |
| Other relatives | Always | Often | | | Rarely | | | Never | | | Not applicable | |
| ***OFFICIAL*** | | | | | | | | | | | | |
| Schooling | Always | Often | | Rarely | | | Never | | | Not applicable | | |
| Teachers | Always | Often | | Rarely | | | Never | | | Not applicable | | |
| Classmates | Always | Often | | Rarely | | | Never | | | Not applicable | | |
| ***IMMEDIATE ENVIRONMENT*** | | | | | | | | | | | | |
| Friends | Always | Often | | Rarely | | | Never | | | Not applicable | | |
| Neighbours | Always | Often | | Rarely | | | Never | | | Not applicable | | |
|  |  |  | |  | | |  | | |  | | |
| **LANGUAGE USE** | | | | | | | | | | | | |
| Are you still using this language? Yes No  If no, when did you stop using it? _ years old If yes, how often do you use it currently?  Daily Weekly Monthly Yearly  In what context do you use this language? (You can pick more than one)  Family (Parents, partner, relatives, children etc.) Work/School Friends/ Neighbours TV/Radio Books/magazines Shopping Others (Please specify: …………………………………….…) | | | | | | | | | | | | |
| **LANGUAGE PROFICIENCY** | | | | | | | | | | | | |
| Please rate your proficiency in this language in each of the following aspects: ( *1- poor; 4 - native/near native)* | | | | | | | | | | | | |
| Speaking | | | 1 | | | 2 | | | 3 | | | 4 |
| Understanding | | | 1 | | | 2 | | | 3 | | | 4 |
| Reading | | | 1 | | | 2 | | | 3 | | | 4 |
| Writing | | | 1 | | | 2 | | | 3 | | | 4 |
| **NOTES** | | | | | | | | | | | | |

| **LANGUAGE:** | | | | | | | | | | |
| --- | --- | --- | --- | --- | --- | --- | --- | --- | --- | --- |
| **LANGUAGE HISTORY – ACQUISITION OF THE LANGUAGE** | | | | | | | | | | |
| 1. When were you first exposed to the language? years old 2. In what context were you exposed to the language? 3. When did you start learning the language? years old 4. At what age did you start to speak this language proficiently and actively? years 5. Choose the most appropriate option: I understand the language but I don’t speak it   I both understand and speak the language Are you still using this language? Yes No  If no, when did you stop using it? _ years old  If yes, how often do you use it currently?  Daily Weekly Monthly Yearly  In what context do you use this language? (You can pick more than one)  Family (Parents, partner, relatives, children etc.) Work/School Friends/ Neighbours TV/Radio Books/magazines Shopping Others (Please specify: …………………………………….…) | | | | | | | | | | |
| Please rate your proficiency in this language in each of the following aspects: ( *1- poor; 4 - native/near native)* | | | | | | | | | | |
| Speaking | 1 | 2 | | | 3 | | | 4 | | |
| Understanding | 1 | 2 | | | 3 | | | 4 | | |
| Reading | 1 | 2 | | | 3 | | | 4 | | |
| Writing | 1 | 2 | | | 3 | | | 4 | | |
| **LANGUAGE :** | | | | | | | | | | |
| **LANGUAGE HISTORY – ACQUISITION OF THE LANGUAGE** | | | | | | | | | | |
| 1. When were you first exposed to the language? years old 2. In what context were you exposed to the language? 3. When did you start learning the language? years old 4. At what age did you start to speak this language proficiently and actively? years 5. Choose the most appropriate option: I understand the language but I don’t speak it   I both understand and speak the language  **LANGUAGE USE**  Are you still using this language? Yes No  If no, when did you stop using it? _ years old If yes, how often do you use it currently?  Daily Weekly Monthly Yearly  In what context do you use this language? (You can pick more than one)  Family (Parents, partner, relatives, children etc.) Work/School Friends/ Neighbours TV/Radio Books/magazines Shopping Others (Please specify: …………………………………….…) | | | | | | | | | | |
| Please rate your proficiency in this language in each of the following aspects: ( *1- poor; 4 - native/near native)* | | | | | | | | | | |
| Speaking | 1 | 2 | | | 3 | | | 4 | | |
| Understanding | 1 | 2 | | | 3 | | | 4 | | |
| Reading | 1 |  |  | 2 |  |  | 3 |  |  | 4 |
| Writing | 1 | 2 | | | 3 | | | 4 | | |

**Bilingual Switching Questionnaire** (Adapted from Rodriguez-Fornells, Kramer, Lorenzo-Seva, Festman & Munte, 2012)

| 1 | When conversing in my main language, I have trouble coming up with certain words and will replace them with a word in my other language(s). | ☐always ☐ frequently ☐ rarely ☐ never |
| --- | --- | --- |
| 2 | When you can’t find a word in your main language, which language would you most often use (switch to) to replace that word? |  |
| 3 | When talking to another bilingual who speaks the same set of languages as you, which best describes your pattern of language use? | ☐ always mixing languages  ☐ frequently mixing languages  ☐ frequently sticking to one language  ☐ always sticking to one language |
| 4 | With regards to Q4, how often do you switch/mix languages? | ☐ once a year  ☐ once a month  ☐ few times a month  ☐ few times a week  ☐every day  Others: |
| 5 | Which pairs of languages are you most likely to mix in a conversation? |  |
| 6 | With whom are you most likely to mix languages in a conversation? | ☐ Family (*Please specify: )*  ☐ Partner  ☐ Friends  ☐ Language classmates  ☐ Others (*Please specify:* ) |
| 7 | In conversation, I switch between (or mix) my languages without noticing until others point it out  to me. | ☐always ☐ frequently ☐ rarely ☐ never |
| 8 | When talking to someone who understands only one of my languages, it happens to me to use words from a language that the other person might not understand | ☐always ☐ frequently ☐ rarely ☐ never |
